# Supplementary material
Source: publisher figshare collection journal article supplement (https://tandf.figshare.com/ndownloader/files/17990837)
Supplement: Supplementary file 1 [file 17990837]

**SUPPLEMENTAL ONLINE MATERIAL**

**Study flow chart**


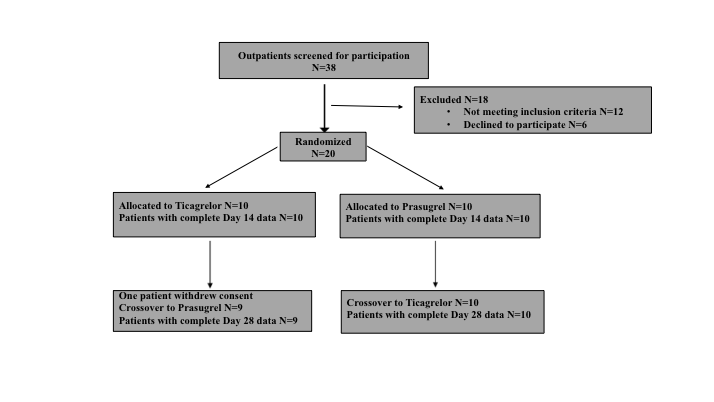


| **Table.** Baseline characteristics of patients. | | | |
| --- | --- | --- | --- |
|  | Allocated to  Prasugrel  Ticagrelor | Allocated to  Ticagrelor  Prasugrel |  |
|  | **N=10** | **N=10** | **P** |
| Age | 61 ± 6.4 | 68.6 ± 5.3 | 0.01 |
| Male gender | 8 (80) | 8 (80) | 1.00 |
| BMI (kg/m2) | 29.6 ± 7.1 | 28.6 ± 4.7 | 0.71 |
| Hyperlipidemia | 8 (80) | 9 (90) | 1.00 |
| Hypertension | 5 (50) | 7 (70) | 0.65 |
| Diabetes mellitus | 5 (50) | 3 (30) | 0.65 |
| Smoking | 9 (90) | 4 (40) | 0.06 |
| Multivessel CAD | 6 (60) | 8 (80) | 0.62 |
| 2nd Prior MI | 0 (0) | 1 (10) | 1.00 |
| Peripheral arterial disease | 1 (10) | 0 (0) | 1.00 |
| FHCAD | 0 (0) | 2 (20) | 0.47 |
| ***Treatment*** |  |  |  |
| Statins | 8 (80) | 10 (100) | 0.47 |
| Proton Pump Inhibitors | 3 (30) | 3 (30) | 1.00 |
| B-blockers | 8 (80) | 9 (90) | 1.00 |
| Calcium Channel Blockers | 3 (30) | 2 (20) | 1.00 |
| ACE/ATII inhibitors | 6 (60) | 5 (50) | 1.00 |
| Diuretics | 1 (10) | 3 (30) | 0.58 |
| ***Laboratory evaluation*** |  |  |  |
| Hematocrit (%) | 41 (4.4) | 41.2 (1.6) | 0.06 |
| eGFR* (mL/min/1.73m²) | 81 (20) | 71 (18) | 0.52 |
| LDL (mg/dl) | 85.9 (35.9) | 62.9 (18.2) | 0.25 |
| Platelets (x 1000/mm3) | 250.8 (65.5) | 218.1 (43.3) | 0.31 |
| PR at baseline (PRU) | 238.4 ± 50 | 259.6 ± 36 | 0.29 |
| BASE | 201 (29) | 207 (10) | 0.51 |
| Data are expressed as mean (±SD) for normally continuous variables, as median (interquartile range) for skewed variables and as frequency (%) for categorical variables. ACE, angiotensin converting enzyme; ATII, angiotensin II; BMI, body mass index; CAD, coronary artery disease; FHCAD, Family history of CAD; eGFR, estimated glomerular filtration rate; LDL, low-density lipoprotein; MI, myocardial infraction; PR, platelet reactivity; PRU= P2Y12 reaction units.  *using the CKD-EPI formula | | | |

**Individual PR values according to treatment**


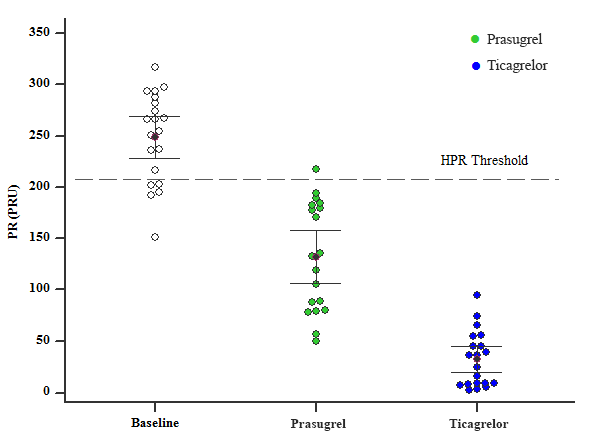


HPR, high platelet reactivity; PR, platelet reactivity; PRU, P2Y12 reaction units. Median, interquartile range are shown.
